# Supplementary material for: Long live the queen, the king and the commoner? Transcript expression differences between old and young in the termite Cryptotermes secundus
Source: PLoS One. 2019 Feb 13;14(2):e0210371. doi: 10.1371/journal.pone.0210371 (PMC6373952; doi:10.1371/journal.pone.0210371)
Supplement: S7 Table — (XLSX) [file pone.0210371.s008.xlsx]

## Sheet: TE_related_Transcripts
S7 Table. Transposable element (TE) related DETs and Dfam results.
Transposable elements related DETs. Transcripts were classified as Transposable element related based on Blast, Interpro, Pfam and Dfam results.
Queens
C. secundus Transcript ID	Expression	'Annotation’	Shared with
Csec_G13150_T1	High in Young vs Old	LTR retrotransposon related	Kings same direction
Csec_G02078_T1	High in Young vs Old	DDE superfamily endonuclease/DNA transposon PIF Harbinger related
Csec_G10950_T1	High in Young vs Old	Transposase (partial DDE domain) protein/DNA transposon TcMar-Mariner related
Csec_G03716_T1	High in Young vs Old	RNA-dependent RNA polymerase, PB1 subunit, Influenza-type domain containing protein
Csec_G06269_T1	High in Young vs Old	Retrotransposon related
Csec_G01644_T2	High in Young vs Old	zinc finger protein/TE-X-12_DR
Csec_G18937_T1	High in Old vs Young	zinc finger protein/TE-X-12_DR	Kings same direction
Csec_G18065_T1	High in Old vs Young	zinc finger protein/TE-X-12_DR
Csec_G12567_T1	High in Old vs Young	LTR retrotransposon related	Kings same direction
Csec_G14967_T1	High in Old vs Young	Integrase core domain/ LTR retrotransposon related
Csec_G00919_T1	High in Old vs Young	Baculovirus F protein/LTR retrotransposon related
Csec_G12246_T1	High in Old vs Young	Baculovirus F protein/LTR retrotransposon related
Csec_G12281_T1	High in Old vs Young	Baculovirus F protein/LTR retrotransposon related	Kings same direction
Csec_G12281_T2	High in Old vs Young	Baculovirus F protein/LTR retrotransposon related	Kings same direction
Csec_G13061_T2	High in Old vs Young	piggyBac transposable element-derived protein
Csec_G14915_T1	High in Old vs Young	Reverse transcriptase (RNA-dependent DNA polymerase) / LTR retrotransposon related
Csec_G13310_T2	High in Old vs Young	zinc finger protein/TE-X-12_DR
Csec_G17544_T1	High in Old vs Young	Reverse transcriptase domain / LINE retrotransposon related
Other DETs related to TEs not identified by Dfam
Csec_G12565_T1	High in Young vs Old	protein pelota	Kings same direction
Csec_G18030_T1	High in Old vs Young	PiggyBac transposable element-derived protein
Kings
C. secundus Transcript ID	Expression	'Annotation’	Shared with
Csec_G01757_T4	High in Young vs Old	zinc finger protein/TE-X-12_DR	Workers same direction
Csec_G13150_T1	High in Young vs Old	LTR retrotransposon related	Queens same direction
Csec_G10611_T6	High in Young vs Old	Reverse transcriptase (RNA-dependent DNA polymerase)/LINE retrotransposon related
Csec_G01755_T1	High in Young vs Old	DNA transposon TcMar-Mariner related
Csec_G07410_T1	High in Young vs Old	PiggyBac transposable element-derived protein / DNA Transposon PiggyBac related	Workers same direction
Csec_G08254_T1	High in Young vs Old	zinc finger protein/TE-X-12_DR
Csec_G09217_T2	High in Young vs Old	zinc finger protein/TE-X-12_DR
Csec_G17156_T1	High in Young vs Old	zinc finger protein/TE-X-12_DR
Csec_G02293_T1	High in Old vs Young	LINE retrotransposon related
Csec_G12567_T1	High in Old vs Young	LTR retrotransposon related	Queens same direction
Csec_G12281_T1	High in Old vs Young	Baculovirus F protein/LTR retrotransposon related	Queens same direction
Csec_G12281_T2	High in Old vs Young	Baculovirus F protein/LTR retrotransposon related	Queens same direction
Csec_G08724_T1	High in Old vs Young	DDE superfamily endonuclease
Csec_G07235_T3	High in Old vs Young	zinc finger protein/TE-X-12_DR
Csec_G16153_T3	High in Old vs Young	DNA Transposon hAT-Charlie related
Other DETs related to TEs not identified by Dfam
Csec_G12565_T1	High in Young vs Old	protein pelota	Queens same direction
Csec_G09348_T1	High in Young vs Old	PiggyBac transposable element-derived protein
Csec_G00719_T1	High in Young vs Old	Heat shock protein cognate 4
Csec_G10538_T1	High in Young vs Old	vasa
Csec_G00719_T1	High in Young vs Old	Heat shock protein cognate 4
Workers
C. secundus Transcript ID	Expression	'Annotation’	Shared with
Csec_G18095_T2	High in Young vs Old	zinc finger protein/TE-X-12_DR
Csec_G01757_T4	High in Young vs Old	zinc finger protein/TE-X-12_DR	Kings same direction
Csec_G12255_T5	High in Young vs Old	zinc finger protein/TE-X-12_DR
Csec_G04979_T2	High in Young vs Old	zinc finger protein/TE-X-12_DR
Csec_G09954_T1	High in Young vs Old	Reverse transcriptase (RNA-dependent DNA polymerase)
Csec_G15919_T1	High in Young vs Old	Reverse transcriptase (RNA-dependent DNA polymerase)
Csec_G15000_T1	High in Young vs Old	Reverse transcriptase (RNA-dependent DNA polymerase)/LINE retrotransposon related
Csec_G12657_T1	High in Young vs Old	Reverse transcriptase (RNA-dependent DNA polymerase)/LINE retrotransposon related
Csec_G09129_T1	High in Young vs Old	Reverse transcriptase (RNA-dependent DNA polymerase)/LINE retrotransposon related
Csec_G04157_T5	High in Young vs Old	LINE retrotransposon or DNA transposon TcMar-Mariner related
Csec_G12442_T1	High in Young vs Old	Transposase_1- Transposase (partial DDE domain)/DNA transposon TcMar-Mariner related
Csec_G17020_T1	High in Young vs Old	Baculovirus F protein/LTR retrotransposon related
Csec_G02005_T2	High in Young vs Old	zinc finger protein/TE-X-12_DR
Csec_G07410_T1	High in Young vs Old	PiggyBac transposable element-derived protein / DNA Transposon PiggyBac related	Kings same direction
Csec_G08125_T1	High in Young vs Old	Reverse transcriptase (RNA-dependent DNA polymerase) / LINE retrotransposon related
Csec_G12104_T2	High in Young vs Old	tigger transposable element-derived protein / DNA transposon TcMar-Tiger related
Csec_G15780_T1	High in Young vs Old	PiggyBac transposable element-derived protein / DNA Transposon PiggyBac related
Csec_G18455_T1	High in Old vs Young	zinc finger protein/TE-X-12_DR
Other DETs related to TEs not identified by Dfam
Csec_G08920_T1	High in Young vs Old	craniofacial development protein
Csec_G16208_T7	High in Young vs Old	eggless
Csec_G15574_T1	High in Old vs Young	Vacuolar H+ ATPase 16kD subunit 1 like

## Sheet: Dfam_results
S7 Table. Transposable element (TE) related DETs and Dfam results.
Dfam results. All matching hits are provided. For more information on nhmmer output see user guide of HMMer v3.1b2. TE related*: Transcripts were classified as Transposable element related based on Blast, Interpro, Pfam and Dfam results.
Queens
Higher expression in Young vs Old
Target name	acc	Query name	Bits	e-value	bias	hmm-st	hmm-en	strand	ali-st	ali-en	env-st	env-en	modlen	description of target	Classification	TE related*
Harbinger-7_DR	DF0003434.0	Csec_G02078_T1	69.6	7.5e-20	14.2	61	507	+	469	915	446	936	1181	DNA transposon from zebrafish -fragment	DNA Transposon, Cut and Paste, PIF-Harbinger	Yes
HSMAR2	DF0000213.4	Csec_G10950_T1	84.8	1.7e-24	22.1	206	1097	+	236	1127	216	1147	1302	TcMar-Mariner DNA transposon, HSMAR2 subfamily	DNA Transposon, Cut and Paste, TcMar-Mariner	Yes
MARNA	DF0000779.4	Csec_G10950_T1	112.3	2.9e-32	10.7	243	578	+	1010	1347	990	1348	586	TcMar-Mariner DNA transposon, MARNA subfamily (non-autonomous)	DNA Transposon, Cut and Paste, TcMar-Mariner	“
Copia-7-I_DR	DF0003897.0	Csec_G13150_T1	97.8	1.5e-28	12.2	1134	1501	-	1209	833	1231	813	3222	LTR retrotransposon from zebrafish: internal sequence	Retrotransposon, LTR, Gipsy?	Yes
Copia-7-I_DR	DF0003897.0	Csec_G13150_T1	135	9.1e-40	16.3	1110	1501	-	1656	1256	1668	1236	3222	LTR retrotransposon from zebrafish: internal sequence	Retrotransposon, LTR, Gipsy?	“
Copia-7-I_DR	DF0003897.0	Csec_G13150_T1	83.2	3.6e-24	7.4	1110	1481	-	2070	1699	2083	1678	3222	LTR retrotransposon from zebrafish: internal sequence	Retrotransposon, LTR, Gipsy?	“
Copia-7-I_DR	DF0003897.0	Csec_G13150_T1	106.2	4.4e-31	10.4	1118	1468	-	2431	2099	2451	2079	3222	LTR retrotransposon from zebrafish: internal sequence	Retrotransposon, LTR, Gipsy?	“
Copia-7-I_DR	DF0003897.0	Csec_G13150_T1	128.7	7.1e-38	12.3	1119	1529	-	2880	2470	2881	2450	3222	LTR retrotransposon from zebrafish: internal sequence	Retrotransposon, LTR, Gipsy?	“
Copia-7-I_DR	DF0003897.0	Csec_G13150_T1	129.8	3.5e-38	12.1	1118	1529	-	3151	2740	3158	2720	3222	LTR retrotransposon from zebrafish: internal sequence	Retrotransposon, LTR, Gipsy?	“
Copia-7-I_DR	DF0003897.0	Csec_G13150_T1	128.8	6.8e-38	12.8	1118	1528	-	3421	3011	3441	3007	3222	LTR retrotransposon from zebrafish: internal sequence	Retrotransposon, LTR, Gipsy?	“
Copia-16_DR-I	DF0003438.0	Csec_G13150_T1	66.5	2e-18	17.2	404	908	-	3771	3194	3791	3192	1058	LTR retrotransposon from zebrafish: internal sequence	Retrotransposon, LTR, Gipsy?	“
Copia-7-I_DR	DF0003897.0	Csec_G13150_T1	127	2.3e-37	18.9	1101	1748	-	4140	3379	4160	3360	3222	LTR retrotransposon from zebrafish: internal sequence	Retrotransposon, LTR, Gipsy?	“
Copia-7-I_DR	DF0003897.0	Csec_G13150_T1	84.9	1.1e-24	11.9	1101	1532	-	4446	3961	4448	3959	3222	LTR retrotransposon from zebrafish: internal sequence	Retrotransposon, LTR, Gipsy?	“
Copia-7-I_DR	DF0003897.0	Csec_G13150_T1	126.6	3.1e-37	20.8	1110	1511	-	4662	4261	4683	4245	3222	LTR retrotransposon from zebrafish: internal sequence	Retrotransposon, LTR, Gipsy?	“
TE-X-12_DR	DF0004001.0	Csec_G01644_T2	97.7	1.4e-27	24.3	222	888	-	1103	429	1110	412	1351	Transposable element from zebrafish	Unknown	Yes
TE-X-12_DR	DF0004001.0	Csec_G01644_T2	94.8	1e-26	4.2	382	785	-	1550	1141	1573	1133	1351	Transposable element from zebrafish	Unknown	“
FW2_DM	DF0001598.0	Csec_G06269_T1	486.5	2.6e-145	228.9	325	3769	+	10150	13605	10129	13625	3961	FW2_DM is a non-LTR retrotransposon	Retrotransposon, LINE, Jockey	Yes
Mariner2_CE	DF0001516.0	Csec_G06269_T1	47.6	3.4e-12	0.5	604	1053	-	8355	7884	8375	7810	1242	Autonomous DNA transposon from C. elegans	DNA Transposon, Cut and Paste, TcMar-Mariner	“
EutTc1-N1	DF0001170.2	Csec_G14385_T1	60.7	1.2e-15	6.8	195	357	+	6950	7104	6930	7124	588	Ancient Mariner/Tc1 DNA transposon from eutherian mammals.	DNA Transposon, Cut and Paste, TcMar-Tc1	No – Retinoic acid induced 16-like protein
X33a_DNA	DF0001167.2	Csec_G14385_T1	95.6	6.4e-26	27.9	84	373	+	7043	7290	7033	7291	375	Mariner DNA conserved in all mammals.	DNA Transposon, Cut and Paste, TcMar-Tc1	No – Retinoic acid induced 16-like protein
Higher expression in Old vs Young
Target name	acc	Query name	Bits	e-value	bias	hmm-st	hmm-en	strand	ali-st	ali-en	env-st	env-en	modlen	description of target	Classification	TE related*
HSMAR2	DF0000213.4	Csec_G03674_T2	36.7	4.6e-09	1.9	431	705	+	6837	7108	6817	7128	1302	TcMar-Mariner DNA transposon, HSMAR2 subfamily	DNA Transposon, Cut and Paste, TcMar-Mariner	No – Protein phosphatase 2C
ZAM_I	DF0001526.0	Csec_G12246_T1	494.7	1.2e-148	73.5	3173	4479	+	233	1547	212	1571	7490	ZAM_I is an internal portion of the ZAM retrovirus.	Retrotransposon, LTR, Gipsy	Yes
DM412	DF0001575.0	Csec_G12246_T1	101.7	3.4e-30	62.9	5283	6198	+	1685	2591	1665	2612	6477	DM412_I is an internal portion of the 412 LTR retrotransposon.	Retrotransposon, LTR, Unknown	“
ZAM_I	DF0001526.0	Csec_G12281_T1	273.2	6.4e-82	76.5	3679	4486	+	3	807	2	829	7490	ZAM_I is an internal portion of the ZAM retrovirus.	Retrotransposon, LTR, Gipsy	Yes
DM412	DF0001575.0	Csec_G12281_T1	46	2.2e-13	74.7	5284	6103	+	939	1770	919	1804	6477	DM412_I is an internal portion of the 412 LTR retrotransposon.	Retrotransposon, LTR, Gipsy	“
MICROPIA_I	DF0001672.0	Csec_G12567_T1	75.1	5e-22	11.4	1584	2183	+	3892	4521	3872	4533	4476	MICROPIA_I is an internal portion of the MICROPIA retrotransposon.	Retrotransposon, LTR, Gipsy	Yes
ZAM_I	DF0001526.0	Csec_G14967_T1	465.1	1.3e-139	83.9	3171	4486	+	1667	2988	1635	3008	7490	ZAM_I is an internal portion of the ZAM retrovirus.	Retrotransposon, LTR, Gipsy	Yes
DM412	DF0001575.0	Csec_G14967_T1	73.7	1.2e-21	70.7	5258	6103	+	3097	3951	3072	3983	6477	DM412_I is an internal portion of the 412 LTR retrotransposon.	Retrotransposon, LTR	“
MMSAT4	DF0001947.0	Csec_G18065_T1	60.3	2.5e-16	7.8	14	168	+	473	627	460	627	168	Satellite from mouse.	Satellite	Yes
TE-X-12_DR	DF0004001.0	Csec_G18065_T1	86.8	1.8e-25	20.1	59	474	-	452	34	460	14	1351	Transposable element from zebrafish	Unknown	“
TE-X-12_DR	DF0004001.0	Csec_G18937_T1	182.5	3.7e-54	25.2	177	883	-	773	61	780	39	1351	Transposable element from zebrafish	Unknown	Yes
TE-X-12_DR	DF0004001.0	Csec_G18937_T1	126.7	2.5e-37	18.5	59	500	-	977	533	983	531	1351	Transposable element from zebrafish	Unknown	“
EXPANDER1_DR	DF0003503.0	Csec_G04009_T2	28.9	9.6e-08	2.8	5	149	-	3142	2998	3145	2977	3365	RTE-like non-LTR retrotransposon from zebrafish	Retrotransposon, LINE, RTE	No – modular serine protease
LSU-rRNA_Cel	DF0001428.0	Csec_G04009_T2	262.5	5.9e-78	12.2	591	941	-	3513	3167	3518	3156	2432	from Metazoa.	ncNRA Gene	No – modular serine protease
DNAX-25_DR	DF0003686.0	Csec_G06798_T3	28.8	2.9e-07	3	2062	2281	-	4380	4162	4397	4151	3427	Non-autonomous DNA transposon from zebrafish	DNA Transposon, Cut and Paste, Zisupton	No – Set2-like
Tc1-6_DR	DF0003917.0	Csec_G11006_T1	32.7	6.3e-09	3.2	579	803	+	723	953	703	973	1203	DNA transposon from zebrafish	DNA Transposon, Cut and Paste, TcMar-Tc1	No – DUF4187
TE-X-12_DR	DF0004001.0	Csec_G13310_T2	69.7	2.8e-19	11	181	639	-	1611	1157	1616	1138	1351	Transposable element from zebrafish	Unknown	Yes
TE-X-12_DR	DF0004001.0	Csec_G13310_T2	49.2	4e-13	4.5	188	483	-	1856	1560	1868	1556	1351	Transposable element from zebrafish	Unknown	“
TE-X-12_DR	DF0004001.0	Csec_G13310_T2	58.4	7e-16	14.9	66	498	-	2311	1881	2317	1868	1351	Transposable element from zebrafish	Unknown	“
Charlie26a	DF0000103.4	Csec_G14721_T5	47.8	1.2e-11	18.7	66	307	-	5289	5003	5305	4994	325	hAT-Charlie DNA transposon, Charlie26a subfamily (non-autonomous)	DNA Transposon, Cut and Paste, hAT-Charlie	No – PDZ domain containing protein
ZAM_I	DF0001526.0	Csec_G14915_T1	310.2	3.5e-93	46.2	3173	4061	+	3047	3944	3024	3964	7490	ZAM_I is an internal portion of the ZAM retrovirus.	Retrotransposon, LTR, Gipsy	Yes
Daphne-27_DRe	DF0003809.0	Csec_G17544_T1	71.8	1.9e-20	67.3	149	847	+	698	1396	678	1421	1926	L2-like non-LTR retrotransposon from zebrafish	Retrotransposon, LINE, L2	Yes
Kings
Higher expression in Young vs Old
Target name	acc	Query name	Bits	e-value	bias	hmm-st	hmm-en	strand	ali-st	ali-en	env-st	env-en	modlen	description of target	Classification	TE related*
MMSAT4	DF0001947.0	Csec_G01757_T4	56.5	1.5e-14	3.1	4	155	+	1737	1888	1736	1889	168	Satellite from mouse.	Satellite	Yes
MMSAT4	DF0001947.0	Csec_G01757_T4	42.6	2.6e-10	4	16	167	+	1833	1984	1821	1984	168	Satellite from mouse.	Satellite	“
TE-X-12_DR	DF0004001.0	Csec_G01757_T4	147.9	2.5e-43	25	51	830	-	1450	666	1479	646	1351	Transposable element from zebrafish	Unknown	“
TE-X-12_DR	DF0004001.0	Csec_G01757_T4	46.8	7.8e-13	12.5	56	415	-	1780	1421	1780	1409	1351	Transposable element from zebrafish	Unknown	“
TE-X-12_DR	DF0004001.0	Csec_G01757_T4	55.9	1.4e-15	7.2	219	580	-	2035	1673	2055	1662	1351	Transposable element from zebrafish	Unknown	“
MamRTE1	DF0001149.2	Csec_G05420_T1	32.2	1.8e-08	22.6	2088	2473	+	7207	7582	7174	7606	3812	RTE-BovB retrotransposon, MamRTE1 subfamily	Retrotransposon, LINE, RTE-BovB	No – BRCA1-associated ATM activator 1 partial
CR1-L3A_Croc	DF0001326.2	Csec_G07969_T2	50.8	3.8e-14	51.6	2870	3391	+	7402	7947	7381	7967	4288	CR1 (Chicken Repeat 1) retrotransposon, CR1-L3A_Croc subfamily	Retrotransposon, LINE, CR1	No – Peptidase family M1
HSMAR2	DF0000213.4	Csec_G07969_T2	32.6	7e-08	1.3	273	390	-	6275	6158	6295	6138	1302	TcMar-Mariner DNA transposon, HSMAR2 subfamily	DNA Transposon, Cut and Paste, TcMar-Mariner	“
Daphne-27_DRe	DF0003809.0	Csec_G10611_T6	81.2	2.8e-23	86	128	861	+	1331	2062	1307	2096	1926	L2-like non-LTR retrotransposon from zebrafish	Retrotransposon, LINE, L2	Yes
Copia-7-I_DR	DF0003897.0	Csec_G13150_T1	97.8	1.5e-28	12.2	1134	1501	-	1209	833	1231	813	3222	LTR retrotransposon from zebrafish: internal sequence	Retrotransposon, LTR, Gipsy?	Yes
Copia-7-I_DR	DF0003897.0	Csec_G13150_T1	135	9.1e-40	16.3	1110	1501	-	1656	1256	1668	1236	3222	LTR retrotransposon from zebrafish: internal sequence	Retrotransposon, LTR, Gipsy?	“
Copia-7-I_DR	DF0003897.0	Csec_G13150_T1	83.2	3.6e-24	7.4	1110	1481	-	2070	1699	2083	1678	3222	LTR retrotransposon from zebrafish: internal sequence	Retrotransposon, LTR, Gipsy?	“
Copia-7-I_DR	DF0003897.0	Csec_G13150_T1	106.2	4.4e-31	10.4	1118	1468	-	2431	2099	2451	2079	3222	LTR retrotransposon from zebrafish: internal sequence	Retrotransposon, LTR, Gipsy?	“
Copia-7-I_DR	DF0003897.0	Csec_G13150_T1	128.7	7.1e-38	12.3	1119	1529	-	2880	2470	2881	2450	3222	LTR retrotransposon from zebrafish: internal sequence	Retrotransposon, LTR, Gipsy?	“
Copia-7-I_DR	DF0003897.0	Csec_G13150_T1	129.8	3.5e-38	12.1	1118	1529	-	3151	2740	3158	2720	3222	LTR retrotransposon from zebrafish: internal sequence	Retrotransposon, LTR, Gipsy?	“
Copia-7-I_DR	DF0003897.0	Csec_G13150_T1	128.8	6.8e-38	12.8	1118	1528	-	3421	3011	3441	3007	3222	LTR retrotransposon from zebrafish: internal sequence	Retrotransposon, LTR, Gipsy?	“
Copia-16_DR-I	DF0003438.0	Csec_G13150_T1	66.5	2e-18	17.2	404	908	-	3771	3194	3791	3192	1058	LTR retrotransposon from zebrafish: internal sequence	Retrotransposon, LTR, Gipsy?	“
Copia-7-I_DR	DF0003897.0	Csec_G13150_T1	127	2.3e-37	18.9	1101	1748	-	4140	3379	4160	3360	3222	LTR retrotransposon from zebrafish: internal sequence	Retrotransposon, LTR, Gipsy?	“
Copia-7-I_DR	DF0003897.0	Csec_G13150_T1	84.9	1.1e-24	11.9	1101	1532	-	4446	3961	4448	3959	3222	LTR retrotransposon from zebrafish: internal sequence	Retrotransposon, LTR, Gipsy?	“
Copia-7-I_DR	DF0003897.0	Csec_G13150_T1	126.6	3.1e-37	20.8	1110	1511	-	4662	4261	4683	4245	3222	LTR retrotransposon from zebrafish: internal sequence	Retrotransposon, LTR, Gipsy?	“
MARNA	DF0000779.4	Csec_G00490_T1	40.5	1.2e-10	4.6	299	458	+	2	162	1	182	586	TcMar-Mariner DNA transposon, MARNA subfamily (non-autonomous)	DNA Transposon, Cut and Paste, TcMar-Mariner	No
HSMAR2	DF0000213.4	Csec_G01755_T1	66.6	5.5e-18	3.1	309	1056	+	10041	10780	10031	10794	1302	TcMar-Mariner DNA transposon, HSMAR2 subfamily	DNA Transposon, Cut and Paste, TcMar-Mariner	Yes
HSMAR1	DF0000212.4	Csec_G01755_T1	38.5	1.3e-09	1.4	616	1223	+	10363	10968	10341	10978	1287	TcMar-Mariner DNA transposon, HSMAR1 subfamily	DNA Transposon, Cut and Paste, TcMar-Mariner	“
X1_DNA	DF0001305.2	Csec_G01987_T1	54.6	3.1e-14	19.5	4	156	+	4773	4904	4771	4920	746	Conserved repetitive element present in placental mammals.	DNA Transposon, Cut and Paste, TcMar-Tigger	No – brunelleschi
X1_DNA	DF0001305.2	Csec_G01987_T1	42.8	1.1e-10	3.1	644	746	+	5414	5500	5394	5500	746	Conserved repetitive element present in placental mammals.	DNA Transposon, Cut and Paste, TcMar-Tigger
EXPANDER1_DR	DF0003503.0	Csec_G04009_T2	28.9	9.6e-08	2.8	5	149	-	3142	2998	3145	2977	3365	RTE-like non-LTR retrotransposon from zebrafish	Retrotransposon, LINE, RTE	No – modular serine protease
LSU-rRNA_Cel	DF0001428.0	Csec_G04009_T2	262.5	5.9e-78	12.2	591	941	-	3513	3167	3518	3156	2432	from Metazoa.	ncNRA Gene	No – modular serine protease
MARNA	DF0000779.4	Csec_G04809_T5	69.8	1.6e-18	2	246	578	-	6430	6097	6437	6091	586	TcMar-Mariner DNA transposon, MARNA subfamily (non-autonomous)	DNA Transposon, Cut and Paste, TcMar-Mariner	No – Probable Sodium/solute symporter
HSMAR2	DF0000213.4	Csec_G04809_T5	40.3	3.3e-10	5.1	618	1088	-	6795	6325	6834	6304	1302	TcMar-Mariner DNA transposon, HSMAR2 subfamily	DNA Transposon, Cut and Paste, TcMar-Mariner	No – Probable Sodium/solute symporter
piggyBac-1_DR	DF0002913.0	Csec_G07410_T1	25.8	8.2e-07	25.1	690	1393	+	1440	2152	1408	2174	2129	DNA transposon from zebrafish -fragment	DNA Transposon, Cut and Paste, PiggyBac	Yes
MMSAT4	DF0001947.0	Csec_G08254_T1	49.6	2.7e-12	2.8	16	156	+	636	779	625	790	168	Satellite from mouse.	Satellite	Yes
MMSAT4	DF0001947.0	Csec_G08254_T1	33.8	2e-07	1.5	30	168	+	737	878	717	878	168	Satellite from mouse.	Satellite	“
MMSAT4	DF0001947.0	Csec_G08254_T1	65.6	3.5e-17	9.9	3	168	+	881	1046	879	1046	168	Satellite from mouse.	Satellite	“
TE-X-12_DR	DF0004001.0	Csec_G08254_T1	64.1	7.1e-18	13.7	560	908	-	1174	818	1195	804	1351	Transposable element from zebrafish	Unknown	“
TE-X-12_DR	DF0004001.0	Csec_G09217_T2	52.4	1.2e-13	2.6	377	628	-	1598	1345	1618	1329	1351	Transposable element from zebrafish	Unknown	Yes
TE-X-12_DR	DF0004001.0	Csec_G09217_T2	76.4	6.9e-21	4.2	143	464	-	2340	2011	2360	1951	1351	Transposable element from zebrafish	Unknown	“
Daphne-27_DRe	DF0003809.0	Csec_G12896_T4	69.9	4.7e-19	39	158	753	+	8864	9466	8844	9486	1926	L2-like non-LTR retrotransposon from zebrafish	Retrotransposon, LINE, L2	No
Cheshire	DF0000109.4	Csec_G12896_T4	611	2.3e-182	128.7	424	2420	+	12111	14130	12090	14130	2420	hAT-Charlie DNA transposon, Chesire subfamily (autonomous)	DNA Transposon, Cut and Paste, hAT-Charlie	“
LSU-rRNA_Cel	DF0001428.0	Csec_G15629_T1	51.9	2.9e-15	1.4	191	294	+	813	915	787	919	2432	from Metazoa.	ncNRA Gene	No – Ribosomal protein S4
TE-X-12_DR	DF0004001.0	Csec_G17156_T1	109.9	3.2e-32	16.1	231	785	-	611	55	615	36	1351	Transposable element from zebrafish	Unknown	No – Probable zinc finger protein
TE-X-12_DR	DF0004001.0	Csec_G17156_T1	117	2.3e-34	5.2	478	838	-	1068	703	1072	677	1351	Transposable element from zebrafish	Unknown	No – Probable zinc finger protein
tRNA-Pro-CCG	DF0000658.4	Csec_G17505_T2	77	3.3e-20	4.7	2	72	-	4581	4511	4582	4509	74	tRNA-Pro (decoding CCG) gene / pseudogene	ncNRA Gene, tRNA, Undefined	No – Beta-alanine synthase like
Higher expression in Old vs Young
Target name	acc	Query name	Bits	e-value	bias	hmm-st	hmm-en	strand	ali-st	ali-en	env-st	env-en	modlen	description of target	Classification	TE related*
DOC5_DM	DF0001591.0	Csec_G02293_T1	167.6	5.7e-50 111.2	1042	2558	111.2	+	49	1476	29	1509	4682	DOC5_DM is a non-LTR retrotransposon	Retrotransposon, LINE, Jockey	Yes
G_DM	DF0001607.0	Csec_G02293_T1	346.7	5.1e-104	88.7	2705	4165	+	1651	3139	1631	3160	4346	G_DM is a LINE-like retrotransposon.	Retrotransposon, LINE, Jockey	“
Mariner2_CE	DF0001516.0	Csec_G02343_T2	39.9	1.3e-09	0.6	605	1039	-	14488	14021	14509	14001	1242	Autonomous DNA transposon from C. elegans	DNA Transposon, Cut and Paste, TcMar-Mariner	No – epidermal growth factor receptor substrate 15-like
MamRTE1	DF0001149.2	Csec_G03426_T1	29.3	2.6e-07	19.9	2193	2476	+	6622	6890	6588	6911	3812	RTE-BovB retrotransposon, MamRTE1 subfamily	Retrotransposon, LINE, RTE-BovB	No – pancreatic lipase-related protein 2-like
MamRTE2	DF0001177.2	Csec_G03426_T1	29.8	9.7e-07	14.7	48	274	+	6717	6942	6698	6947	1552	RTE-BovB retrotransposon, MamRTE2 subfamily	Retrotransposon, LINE, RTE-BovB	“
ZAM_I	DF0001526.0	Csec_G12281_T1	273.2	6.4e-82	76.5	3679	4486	+	3	807	2	829	7490	ZAM_I is an internal portion of the ZAM retrovirus.	Retrotransposon, LTR, Gipsy	Yes
DM412	DF0001575.0	Csec_G12281_T1	46	2.2e-13	74.7	5284	6103	+	939	1770	919	1804	6477	DM412_I is an internal portion of the 412 LTR retrotransposon.	Retrotransposon, LTR, Unknown	“
MICROPIA_I	DF0001672.0	Csec_G12567_T1	75.1	5e-22	11.4	1584	2183	+	3892	4521	3872	4533	4476	MICROPIA_I is an internal portion of the MICROPIA retrotransposon.	Retrotransposon, LTR, Gipsy	Yes
Tc1-6_DR	DF0003917.0	Csec_G05615_T1	43.9	2.5e-11	0.3	581	742	+	6633	6792	6613	6819	1203	DNA transposon from zebrafish	DNA Transposon, Cut and Paste, TcMar-Tc1	No – spermine oxidase like
MARNA	DF0000779.4	Csec_G05707_T1	53.1	1.9e-13	10.2	283	578	+	4958	5225	4938	5232	586	TcMar-Mariner DNA transposon, MARNA subfamily (non-autonomous)	DNA Transposon, Cut and Paste, TcMar-Mariner	No – Alkaline phosphatase 4
TE-X-12_DR	DF0004001.0	Csec_G05707_T1	205.7	4.2e-60	23.9	368	880	+	10460	10974	10442	10984	1351	Transposable element from zebrafish	Unknown	No – Alkaline phosphatase 4
HSMAR2	DF0000213.4	Csec_G05707_T1	55.4	1.1e-14	3.4	311	1056	-	8470	7733	8491	7720	1302	TcMar-Mariner DNA transposon, HSMAR2 subfamily	DNA Transposon, Cut and Paste, TcMar-Mariner	No – Alkaline phosphatase 4
Mariner2_DM	DF0001665.0	Csec_G05707_T1	30.5	5e-07	11.7	725	912	-	9213	9025	9233	9025	912	MARINER2_DM is a DNA transposon, a partial consensus sequence.	DNA Transposon, Cut and Paste, TcMar-Tc1	No – Alkaline phosphatase 4
Mariner2_DM	DF0001665.0	Csec_G05707_T1	90	5.4e-25	4.2	1	437	-	10025	9589	10025	9568	912	MARINER2_DM is a DNA transposon, a partial consensus sequence.	DNA Transposon, Cut and Paste, TcMar-Tc1	No – Alkaline phosphatase 4
MMSAT4	DF0001947.0	Csec_G07235_T3	39.6	1.3e-09	12.6	16	166	+	765	915	753	917	168	Satellite from mouse.	Satellite	Yes
TE-X-12_DR	DF0004001.0	Csec_G07235_T3	85.1	1.3e-24	16.4	70	456	-	866	477	875	455	1351	Transposable element from zebrafish	Unknown	“
TE-X-12_DR	DF0004001.0	Csec_G07235_T3	110.9	2.1e-32	24.4	236	657	-	1286	863	1306	853	1351	Transposable element from zebrafish	Unknown	“
Cheshire	DF0000109.4	Csec_G16153_T3	375.2	1.5e-111	78.6	998	2246	-	5796	4557	5799	4536	2420	hAT-Charlie DNA transposon, Chesire subfamily (autonomous)	DNA Transposon, Cut and Paste, hAT-Charlie	Yes
Cheshire	DF0000109.4	Csec_G16153_T3	56.7	1.5e-15	11.9	996	1234	-	6028	5794	6030	5790	2420	hAT-Charlie DNA transposon, Chesire subfamily (autonomous)	DNA Transposon, Cut and Paste, hAT-Charlie	“
Cheshire	DF0000109.4	Csec_G16153_T3	76.5	1.6e-21	15.3	969	1234	-	6290	6024	6310	6022	2420	hAT-Charlie DNA transposon, Chesire subfamily (autonomous)	DNA Transposon, Cut and Paste, hAT-Charlie	“
Workers
Higher expression in Young vs Old
Target name	acc	Query name	Bits	e-value	bias	hmm-st	hmm-en	strand	ali-st	ali-en	env-st	env-en	modlen	description of target	Classification	TE related*
MMSAT4	DF0001947.0	Csec_G01757_T4	56.5	1.5e-14	3.1	4	155	+	1737	1888	1736	1889	168	Satellite from mouse.	Satellite	Yes
MMSAT4	DF0001947.0	Csec_G01757_T4	42.6	2.6e-10	4	16	167	+	1833	1984	1821	1984	168	Satellite from mouse.	Satellite	“
TE-X-12_DR	DF0004001.0	Csec_G01757_T4	147.9	2.5e-43	25	51	830	-	1450	666	1479	646	1351	Transposable element from zebrafish	Unknown	“
TE-X-12_DR	DF0004001.0	Csec_G01757_T4	46.8	7.8e-13	12.5	56	415	-	1780	1421	1780	1409	1351	Transposable element from zebrafish	Unknown	“
TE-X-12_DR	DF0004001.0	Csec_G01757_T4	55.9	1.4e-15	7.2	219	580	-	2035	1673	2055	1662	1351	Transposable element from zebrafish	Unknown	“
Daphne-27_DRe	DF0003809.0	Csec_G02838_T1	52.1	3.2e-14	82.8	118	863	-	5041	4298	5061	4276	1926	L2-like non-LTR retrotransposon from zebrafish	Retrotransposon, LINE, L2	No – probable tubulin polyglutamylase TTLL2 like
MARNA	DF0000779.4	Csec_G04157_T5	39.5	3.2e-10	3.1	295	440	+	3	149	1	169	586	TcMar-Mariner DNA transposon, MARNA subfamily (non-autonomous)	DNA Transposon, Cut and Paste, TcMar-Mariner	Yes
Daphne-27_DRe	DF0003809.0	Csec_G04157_T5	27.2	2.5e-07	33.2	635	862	+	170	398	150	468	1926	L2-like non-LTR retrotransposon from zebrafish	Retrotransposon, LINE, L2	“
TE-X-12_DR	DF0004001.0	Csec_G04979_T2	49.5	2.6e-13	2.4	175	454	-	1672	1392	1694	1380	1351	Transposable element from zebrafish	Unknown	Yes
MARNA	DF0000779.4	Csec_G06988_T1	93.5	4.9e-26	6.7	252	508	-	3325	3071	3344	3043	586	TcMar-Mariner DNA transposon, MARNA subfamily (non-autonomous)	DNA Transposon, Cut and Paste, TcMar-Mariner	No – CLK4-associating serine/arginine rich protein
CR1-3_Croc	DF0001325.2	Csec_G07815_T1	44.4	3.1e-12	10.2	1920	2168	+	10712	10972	10691	10993	3605	CR1 (Chicken Repeat 1) retrotransposon, CR1-3_Croc subfamily	Retrotransposon, LINE, CR1	No – GRIP domain containing protein
CR1-46_DR	DF0003986.0	Csec_G07815_T1	25.6	1.4e-06	17	2987	3197	+	10913	11126	10892	11184	4116	Non-LTR retrotransposon from zebrafish	Retrotransposon, LINE, L2	“
CR1-L3A_Croc	DF0001326.2	Csec_G07969_T2	50.8	3.8e-14	51.6	2870	3391	+	7402	7947	7381	7967	4288	CR1 (Chicken Repeat 1) retrotransposon, CR1-L3A_Croc subfamily	Retrotransposon, LINE, CR1	No – Peptidase family M1
HSMAR2	DF0000213.4	Csec_G07969_T2	32.6	7e-08	1.3	273	390	-	6275	6158	6295	6138	1302	TcMar-Mariner DNA transposon, HSMAR2 subfamily	DNA Transposon, Cut and Paste, TcMar-Mariner	“
CR1-49_DR	DF0002334.0	Csec_G08164_T2	40.8	7e-11	27.8	1085	1369	+	2401	2699	2388	2719	2425	Non-LTR retrotransposon from zebrafish	Retrotransposon, LINE, L2	No – GDSL-like Lipase
CR1-25_DR	DF0002759.0	Csec_G08164_T2	38.7	2e-10	30.7	1700	2086	+	2420	2818	2400	2840	3105	CR1-like non-LTR retrotransposon from zebrafish	Retrotransposon, LINE, L2	“
Daphne-27_DRe	DF0003809.0	Csec_G09129_T1	81.4	1.9e-23	76.9	46	751	+	270	990	251	1014	1926	L2-like non-LTR retrotransposon from zebrafish	Retrotransposon, LINE, L2	Yes
TE-X-12_DR	DF0004001.0	Csec_G12255_T5	115.3	2e-33	0.8	236	968	-	2351	1626	2365	1598	1351	Transposable element from zebrafish	Unknown	Yes
HSMAR2	DF0000213.4	Csec_G12442_T1	40.3	4e-11	5.1	618	1088	+	547	1017	508	1038	1302	TcMar-Mariner DNA transposon, HSMAR2 subfamily	DNA Transposon, Cut and Paste, TcMar-Mariner	Yes
MARNA	DF0000779.4	Csec_G12442_T1	68.8	3.9e-19	2	246	577	+	912	1244	905	1245	586	TcMar-Mariner DNA transposon, MARNA subfamily (non-autonomous)	DNA Transposon, Cut and Paste, TcMar-Mariner	“
Daphne-27_DRe	DF0003809.0	Csec_G12657_T1	81.5	1.3e-23	85.7	128	861	+	189	920	164	955	1926	L2-like non-LTR retrotransposon from zebrafish	Retrotransposon, LINE, L2	Yes
Daphne-27_DRe	DF0003809.0	Csec_G15000_T1	81.2	1.3e-23	86.3	128	861	+	182	913	157	946	1926	L2-like non-LTR retrotransposon from zebrafish	Retrotransposon, LINE, L2	Yes
Helitron1Nb_Mam	DF0000158.4	Csec_G16695_T3	44.2	4.3e-11	6.2	791	918	+	5218	5324	5196	5326	1116	Helitron DNA transposon, Helitron1Nb_Mam subfamily	DNA Transposon, Rolling circle, Helitron	No – vacuolar protein sorting-associated protein 4
Helitron1Na_Mam	DF0000006.4	Csec_G16695_T3	36.5	8.6e-09	15.9	966	1058	+	5731	5829	5711	5833	1062	Helitron DNA transposon, Helitron1Na_Mam subfamily	DNA Transposon, Rolling circle, Helitron	“
ZAM_I	DF0001526.0	Csec_G17020_T1	276.1	6.3e-83	14.6	3974	4541	+	15	587	3	609	7490	ZAM_I is an internal portion of the ZAM retrovirus.	Retrotransposon, LTR, Gipsy	Yes
DM412	DF0001575.0	Csec_G17020_T1	125	2.5e-37	44.8	5335	6265	+	722	1664	701	1684	6477	DM412_I is an internal portion of the 412 LTR retrotransposon.	Retrotransposon, LTR, Unknown	“
Mariner2_DM	DF0001665.0	Csec_G17062_T1	37.5	1.6e-09	2	456	606	-	3120	2971	3140	2950	912	MARINER2_DM is a DNA transposon, a partial consensus sequence.	DNA Transposon, Cut and Paste, TcMar-Tc1	No – deoxyhypusine synthase
TE-X-12_DR	DF0004001.0	Csec_G18095_T2	57.7	4.4e-16	36.8	41	548	-	1889	1352	1909	1344	1351	Transposable element from zebrafish	Unknown	Yes
G_DM	DF0001607.0	Csec_G00778_T1	111.7	3.2e-33	22	3516	4097	+	2322	2910	2304	2939	4346	G_DM is a LINE-like retrotransposon.	Retrotransposon, LINE, Jockey	No – Origin recognition complex subunit 3
TE-X-12_DR	DF0004001.0	Csec_G01275_T5	153.5	7.9e-45	20	148	988	-	1722	836	1734	815	1351	Transposable element from zebrafish	Unknown	No – Transcription repressor CTCF
TE-X-12_DR	DF0004001.0	Csec_G02005_T2	45.8	2.6e-12	11.4	262	703	-	1653	1205	1674	1185	1351	Transposable element from zebrafish	Unknown	Yes
TE-X-12_DR	DF0004001.0	Csec_G02005_T2	92.8	1.6e-26	8	65	582	-	2710	2145	2736	2125	1351	Transposable element from zebrafish	Unknown	“
MARNA	DF0000779.4	Csec_G07348_T1	50.7	7.9e-13	15.1	280	575	+	5205	5500	5182	5506	586	TcMar-Mariner DNA transposon, MARNA subfamily (non-autonomous)	DNA Transposon, Cut and Paste, TcMar-Mariner	No – Peroxisomal Membrane Protein 70 kDa like
piggyBac-1_DR	DF0002913.0	Csec_G07410_T1	25.8	8.2e-07	25.1	690	1393	+	1440	2152	1408	2174	2129	DNA transposon from zebrafish -fragment	DNA Transposon, Cut and Paste, PiggyBac	Yes
Tigger19a	DF0000835.4	Csec_G07831_T2	36.3	6.2e-08	7	245	314	-	6647	6578	6667	6572	323	TcMar-Tigger DNA transposon, Tigger19a subfamily (non-autonomous)	DNA Transposon, Cut and Paste, TcMar-Tigger	No – FERM, RhoGEF and pleckstrin domain-containing protein
CR1-37_DR	DF0003385.0	Csec_G08125_T1	64.5	1.2e-18	46.3	1068	1645	+	675	1267	655	1289	2717	CR1-like non-LTR retrotransposon from zebrafish	Retrotransposon, LINE, L2	Yes
Daphne-27_DRe	DF0003809.0	Csec_G08125_T1	65.1	1.9e-18	63.8	119	861	+	688	1428	668	1450	1926	L2-like non-LTR retrotransposon from zebrafish	Retrotransposon, LINE, L2	“
Tc1-6_DR	DF0003917.0	Csec_G11006_T1	32.7	6.3e-09	3.2	579	803	+	723	953	703	973	1203	DNA transposon from zebrafish	DNA Transposon, Cut and Paste, TcMar-Tc1	NA
Tigger4	DF0000844.4	Csec_G12104_T2	135.1	5.5e-40	47.7	458	1649	+	359	1538	339	1585	2731	TcMar-Tigger DNA transposon, Tigger4 subfamily (autonomous)	DNA Transposon, Cut and Paste, TcMar-Tigger	Yes
piggyBac-1_DR	DF0002913.0	Csec_G15780_T1	25.8	6.1e-07	25.1	690	1393	+	453	1165	421	1187	2129	DNA transposon from zebrafish -fragment	DNA Transposon, Cut and Paste, PiggyBac	Yes
Higher expression in Old vs Young
Target name	acc	Query name	Bits	e-value	bias	hmm-st	hmm-en	strand	ali-st	ali-en	env-st	env-en	modlen	description of target	Classification	TE related*
MamRTE1	DF0001149.2	Csec_G03426_T1	29.3	2.6e-07	19.9	2193	2476	+	6622	6890	6588	6911	3812	RTE-BovB retrotransposon, MamRTE1 subfamily	Retrotransposon, LINE, RTE-BovB	No – lipase
MamRTE2	DF0001177.2	Csec_G03426_T1	29.8	9.7e-07	14.7	48	274	+	6717	6942	6698	6947	1552	RTE-BovB retrotransposon, MamRTE2 subfamily	Retrotransposon, LINE, RTE-BovB	“
piggyBac-1_DR	DF0002913.0	Csec_G09731_T1	25.4	3.7e-06	27.2	662	1450	-	9803	9036	9831	9015	2129	DNA transposon from zebrafish -fragment	DNA Transposon, Cut and Paste, PiggyBac	No – Multidrug resistance-associated protein 5
DOC6_DM	DF0001592.0	Csec_G14667_T1	26	6.8e-07	21	2792	3436	-	4988	4355	5009	4335	4222	DOC6_DM is a non-LTR retrotransposon	Retrotransposon, LINE, Jockey	No – UDP-glucose 4-epimerase like
MamRTE1	DF0001149.2	Csec_G16263_T1	43.2	7.5e-12	31.5	2048	2624	-	4577	4010	4602	3989	3812	RTE-BovB retrotransposon, MamRTE1 subfamily	Retrotransposon, LINE, RTE-BovB	No – Major Facilitator Superfamily / Sugar (and other) transporter
Tc1-6_DR	DF0003917.0	Csec_G16939_T2	38.1	1e-09	1.3	474	754	-	4915	4622	4936	4608	1203	DNA transposon from zebrafish	DNA Transposon, Cut and Paste, TcMar-Tc1	No – CSC1-like protein 2 like
TE-X-12_DR	DF0004001.0	Csec_G18455_T1	258.2	4.6e-77	12.9	58	873	-	889	68	893	48	1351	Transposable element from zebrafish	Unknown	Yes
X1_DNA	DF0001305.2	Csec_G03868_T1	30.5	6.7e-07	2.6	688	746	-	5329	5272	5339	5272	746	Conserved repetitive element present in placental mammals.	DNA Transposon, Cut and Paste, TcMar-Tigger	No – Swiss cheese
X1_DNA	DF0001305.2	Csec_G03868_T1	67.7	3.8e-18	12.4	1	140	-	5466	5350	5466	5345	746	Conserved repetitive element present in placental mammals.	DNA Transposon, Cut and Paste, TcMar-Tigger	No – Swiss cheese
Tigger4	DF0000844.4	Csec_G12079_T4	29.6	8.2e-08	15.6	1054	1490	+	4880	5284	4868	5298	2731	TcMar-Tigger DNA transposon, Tigger4 subfamily (autonomous)	DNA Transposon, Cut and Paste, TcMar-Tigger	NA
